# Supplementary material for: Discovery, bioactivities and biosynthesis of spirooxindole alkaloids
Source: Royal Society of Chemistry journal article supplement (doi:10.1039/d5np00046g), 2026-01-01
Supplement: d5np00046g1.pdf [file d5np00046g1.pdf]

## Supporting Information

### Discovery, Bioactivities and Biosynthesis of the Spirooxindole Alkaloids

Ruijie Chen <sup>a,b</sup>, Lihan Zhang <sup>a,b</sup>, Xiaoyang Zhao <sup>a,b</sup>, Zhuangjie Fang <sup>a</sup>, Liping Zhang <sup>a,b,c</sup>, Qingbo Zhang <sup>a,b,c\*</sup>, Changsheng Zhang <sup>a,b,c\*</sup>, Yiguang Zhu <sup>a,b,c\*</sup>

<sup>a</sup>State Key Laboratory of Tropical Oceanography, Guangdong Key Laboratory of Marine Materia Medica, Laboratory of Tropical Marine Bio-resources and Ecology, South China Sea Institute of Oceanology, Chinese Academy of Sciences, Guangzhou 510301, China;

<sup>b</sup>University of Chinese Academy of Sciences, Beijing 100049, China;

<sup>c</sup>Sanya Institute of Ocean Eco-Environmental Engineering, Sanya 572000, China;

\*Corresponding Author

Email: [zhangqingbo@scsio.ac.cn](mailto:zhangqingbo@scsio.ac.cn) (to Q.Z.); [czhang2006@gmail.com](mailto:czhang2006@gmail.com) (to C.Z.); [ygzhu@scsio.ac.cn](mailto:ygzhu@scsio.ac.cn) (to Y.Z.)

## Content

|                                                                                     |     |
|-------------------------------------------------------------------------------------|-----|
| Figure S1. SOAs from <i>Mitragyna/Uncaria</i> genus (before 2023) .....             | S3  |
| Figure S2. SOAs from <i>Gelsemium</i> genus (before 2023).....                      | S5  |
| Figure S3. SOAs from <i>Alangium</i> , <i>Mappiodoside</i> and <i>Nauclea</i> ..... | S11 |
| Figure S4. SOAs from <i>Tabernaemontana</i> .....                                   | S12 |
| Figure S5. SOAs from <i>Ervatamia</i> .....                                         | S13 |
| Figure S6. SOAs from <i>Voacanga</i> .....                                          | S14 |
| Figure S7. SOAs from <i>Catharanthus</i> .....                                      | S15 |
| Figure S8. SOAs from <i>Aspidosperma</i> , <i>Vinca</i> and <i>Rauvolfia</i> .....  | S16 |

**Figure S1.** SOAs from *Mitragyna/Uncaria* genus (before 2023)

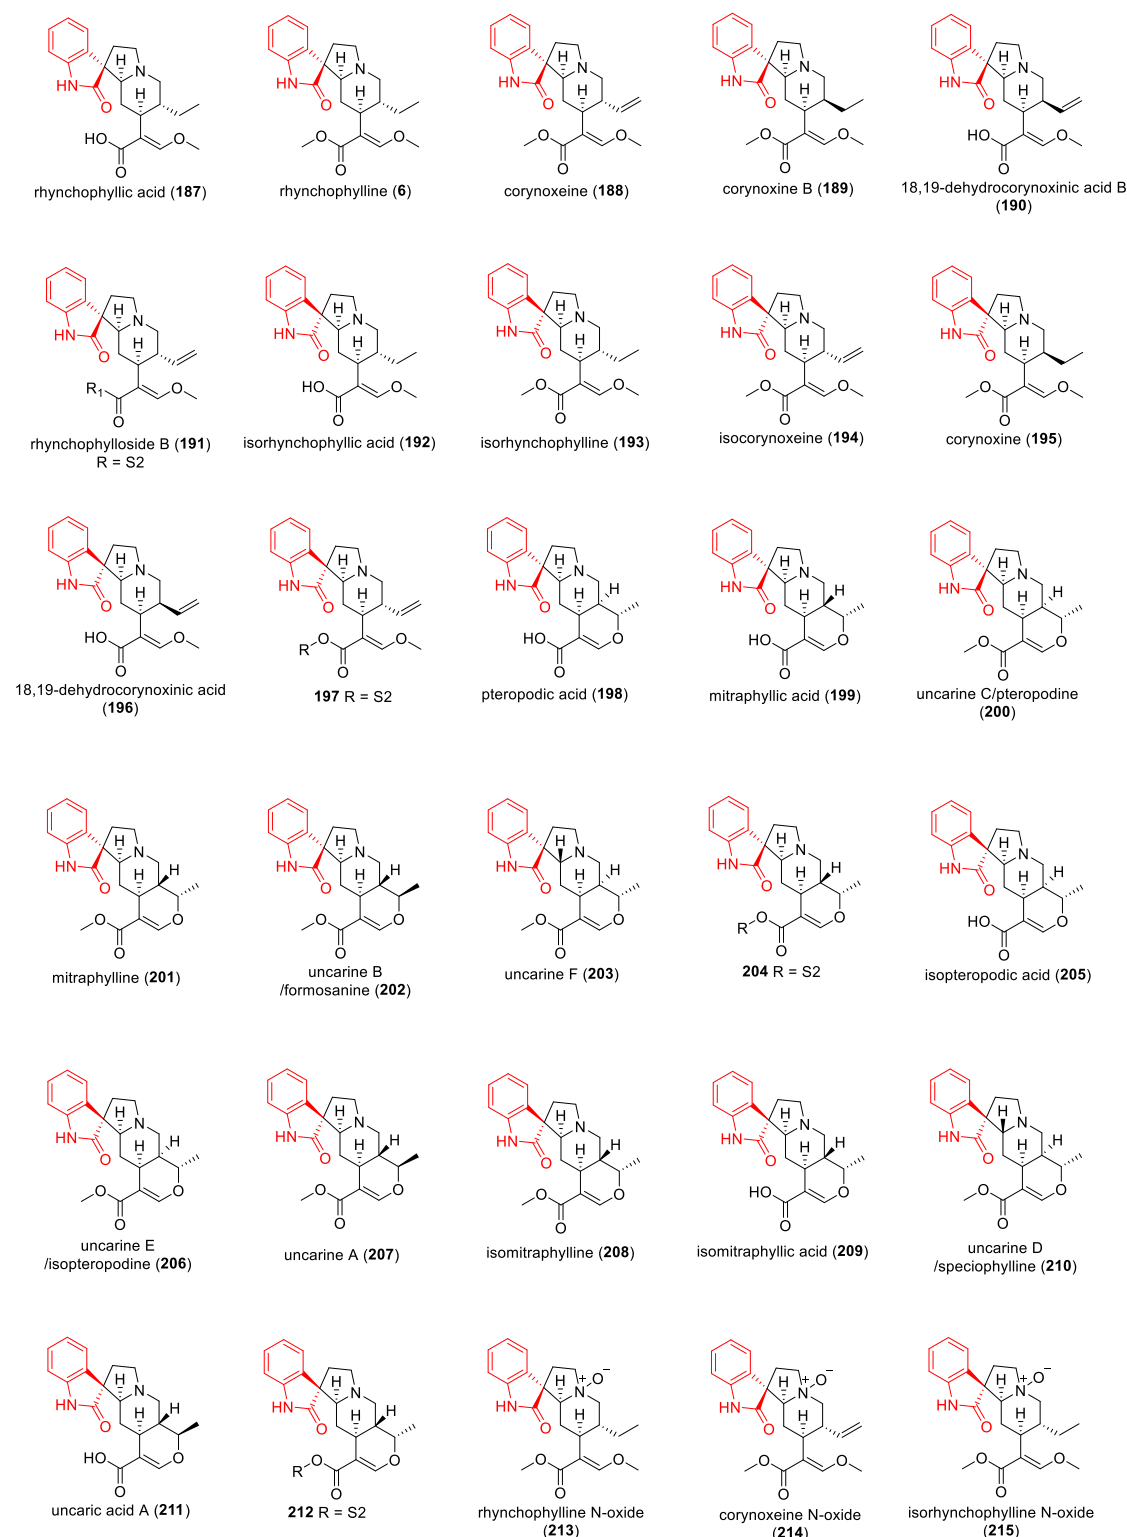

**Figure S1.** SOAs from *Mitragyna/Uncaria* genus (before 2023) (continued)

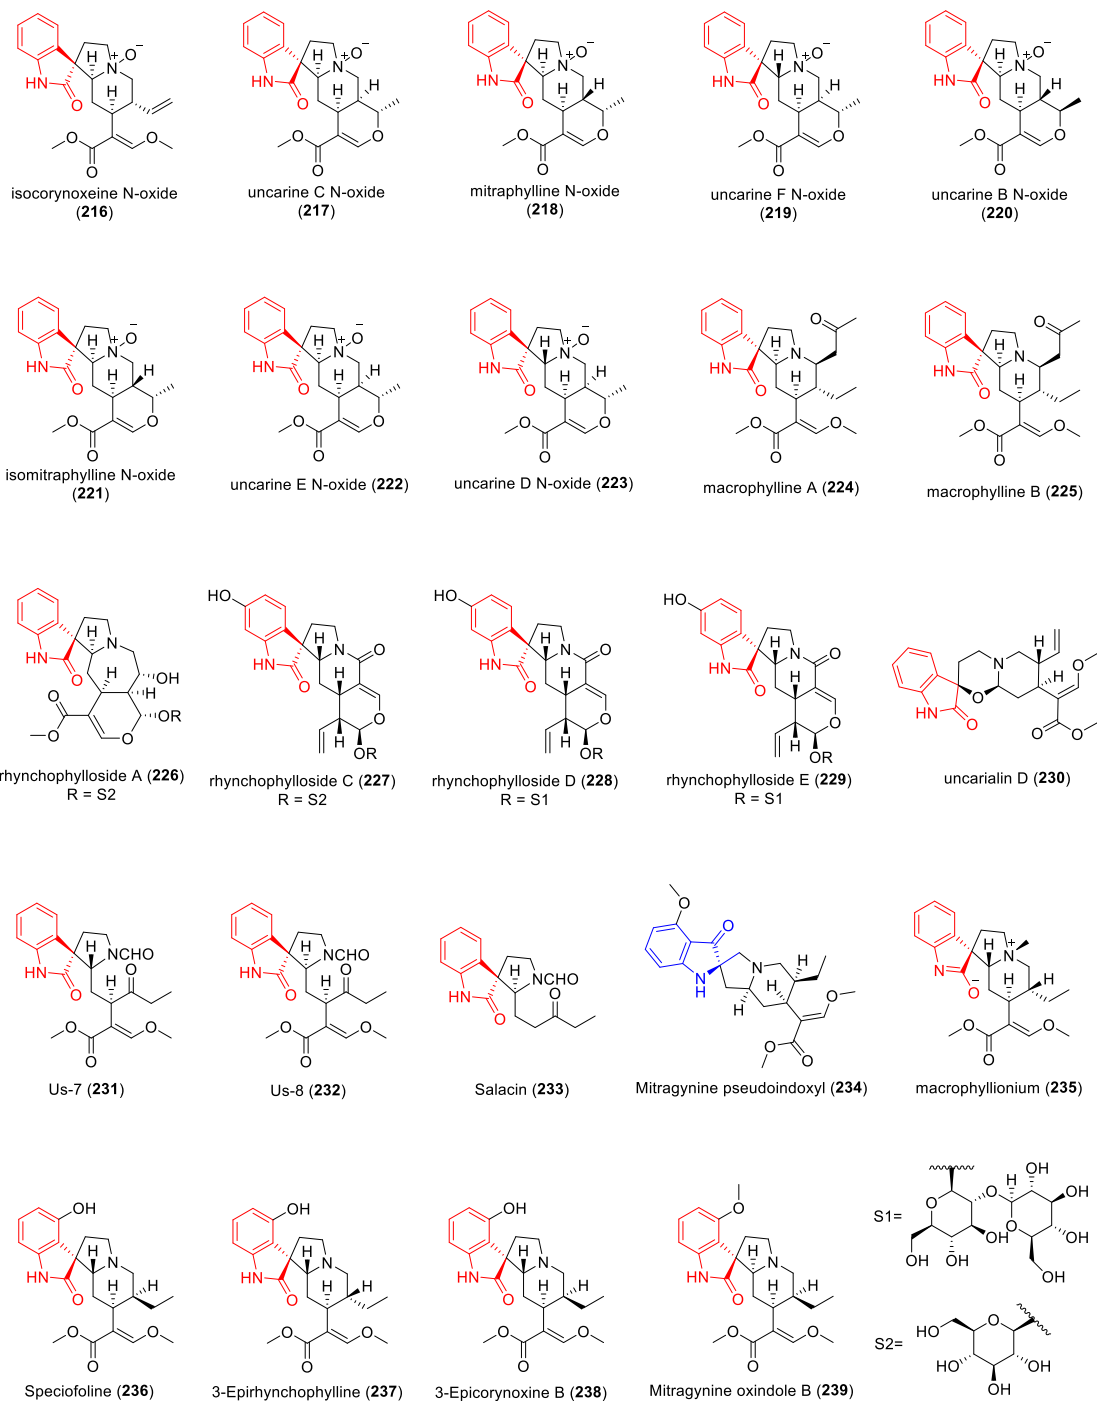

**Figure S2.** SOAs from *Gelsemium* genus (before 2023)

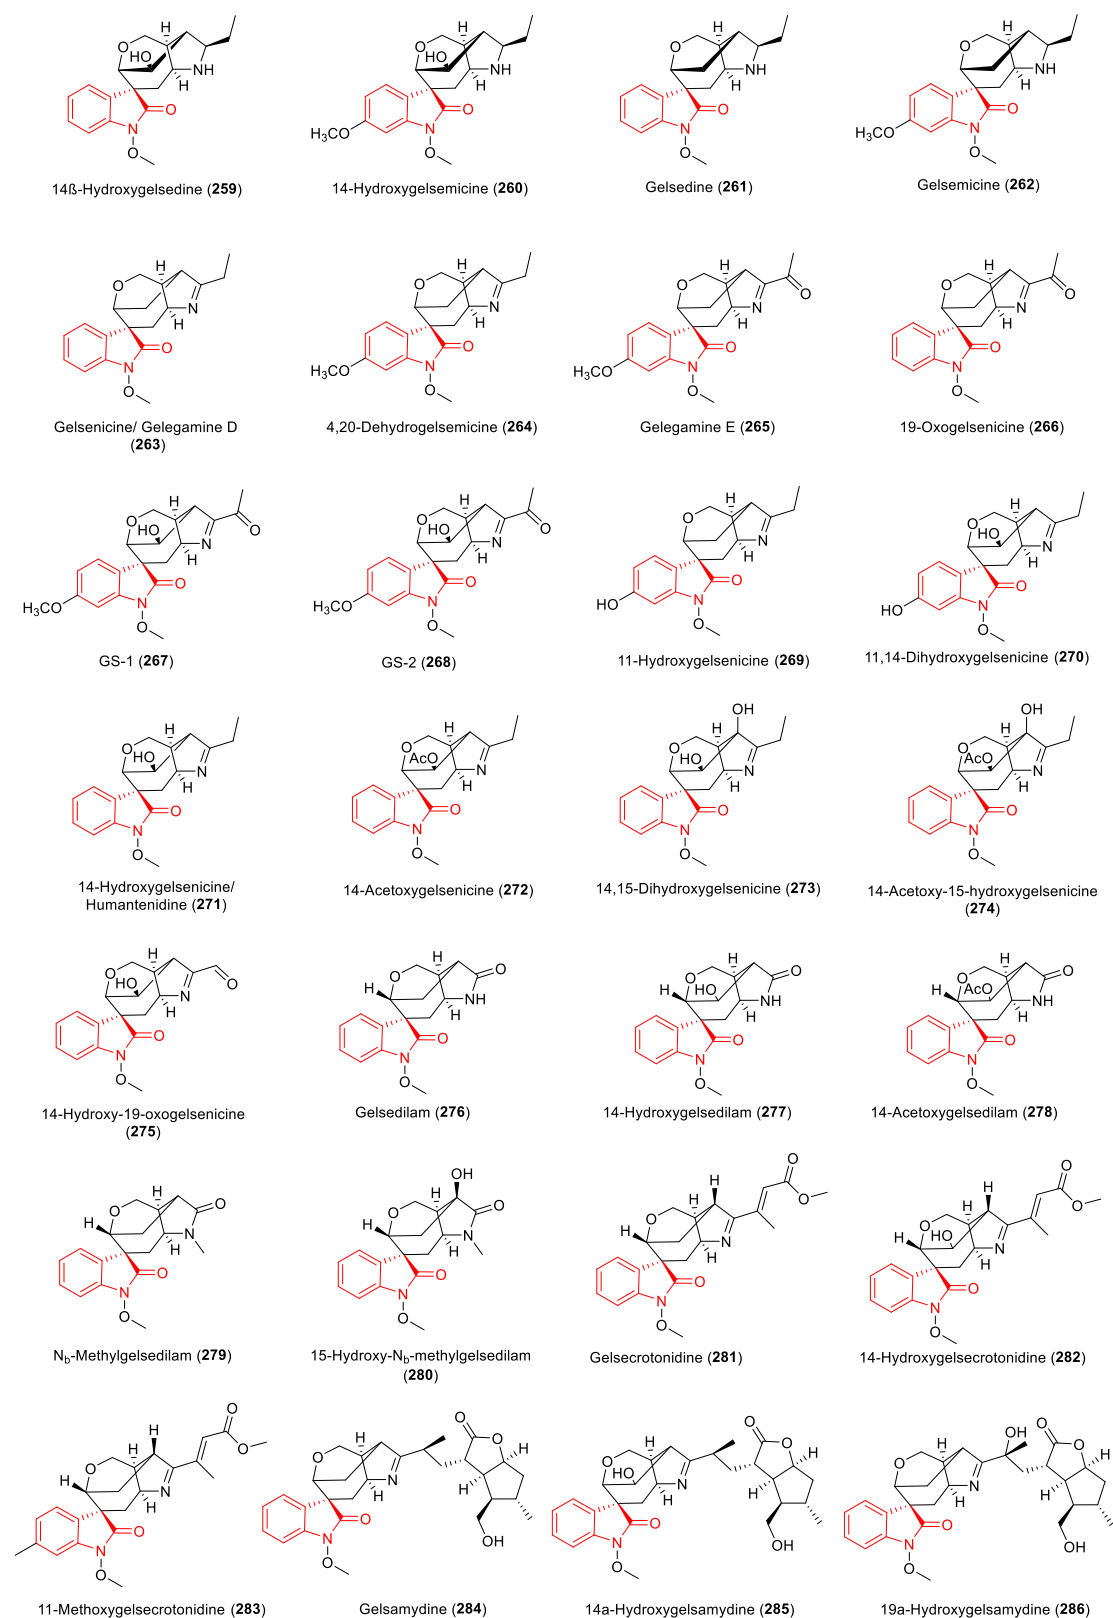

**Figure S2.** SOAs from *Gelsemium* genus (before 2023) (continued)

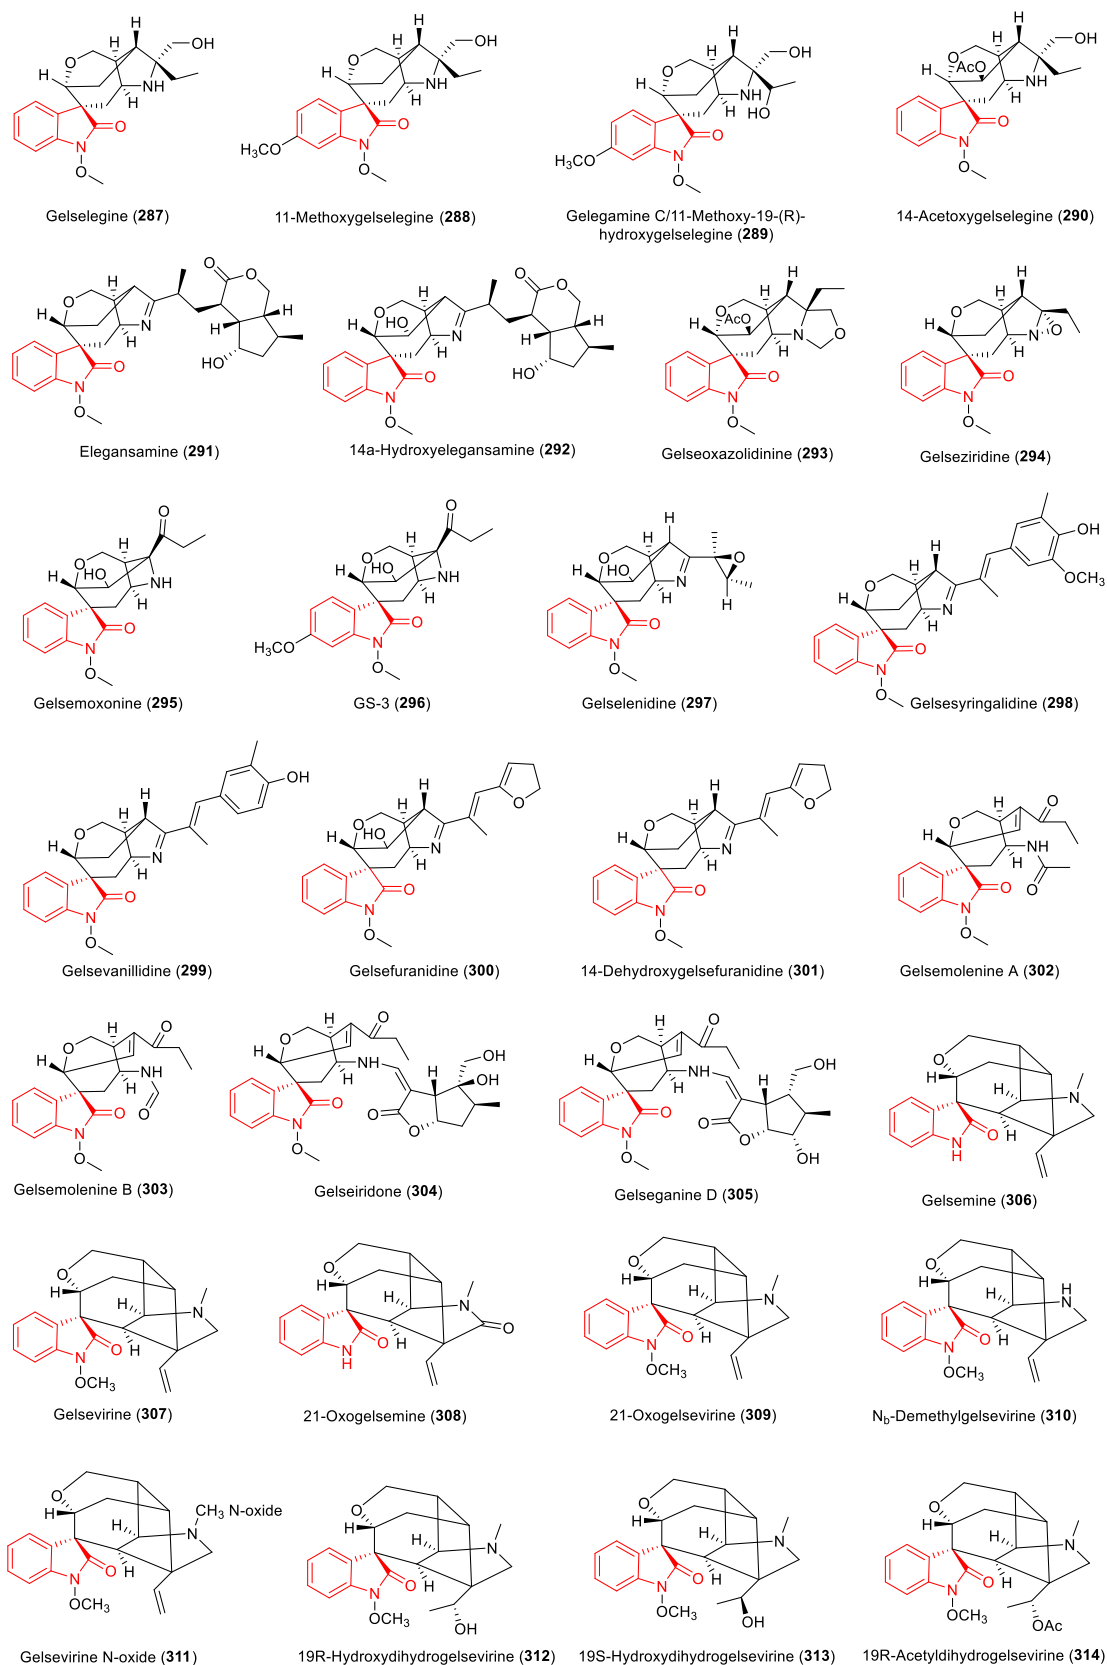

**Figure S2.** SOAs from *Gelsemium gnus* (before 2023) (continued)

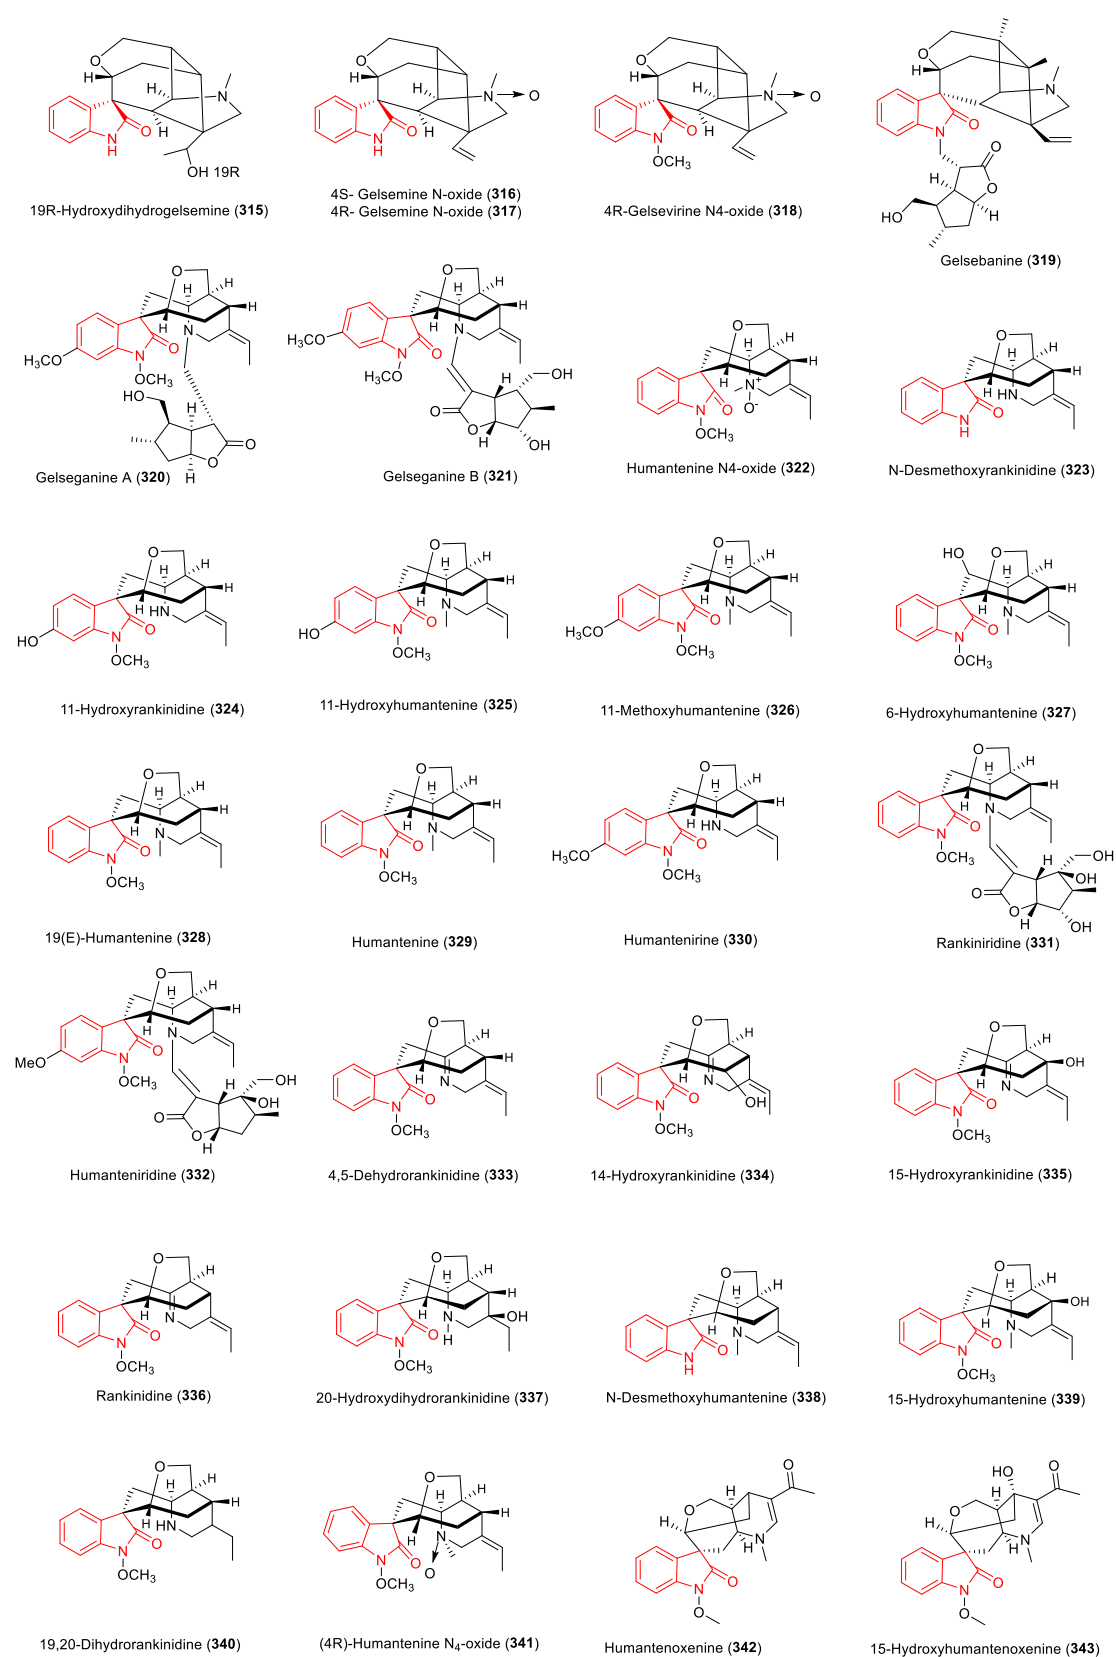

**Figure S2.** SOAs from *Gelsemium* genus (before 2023) (continued)

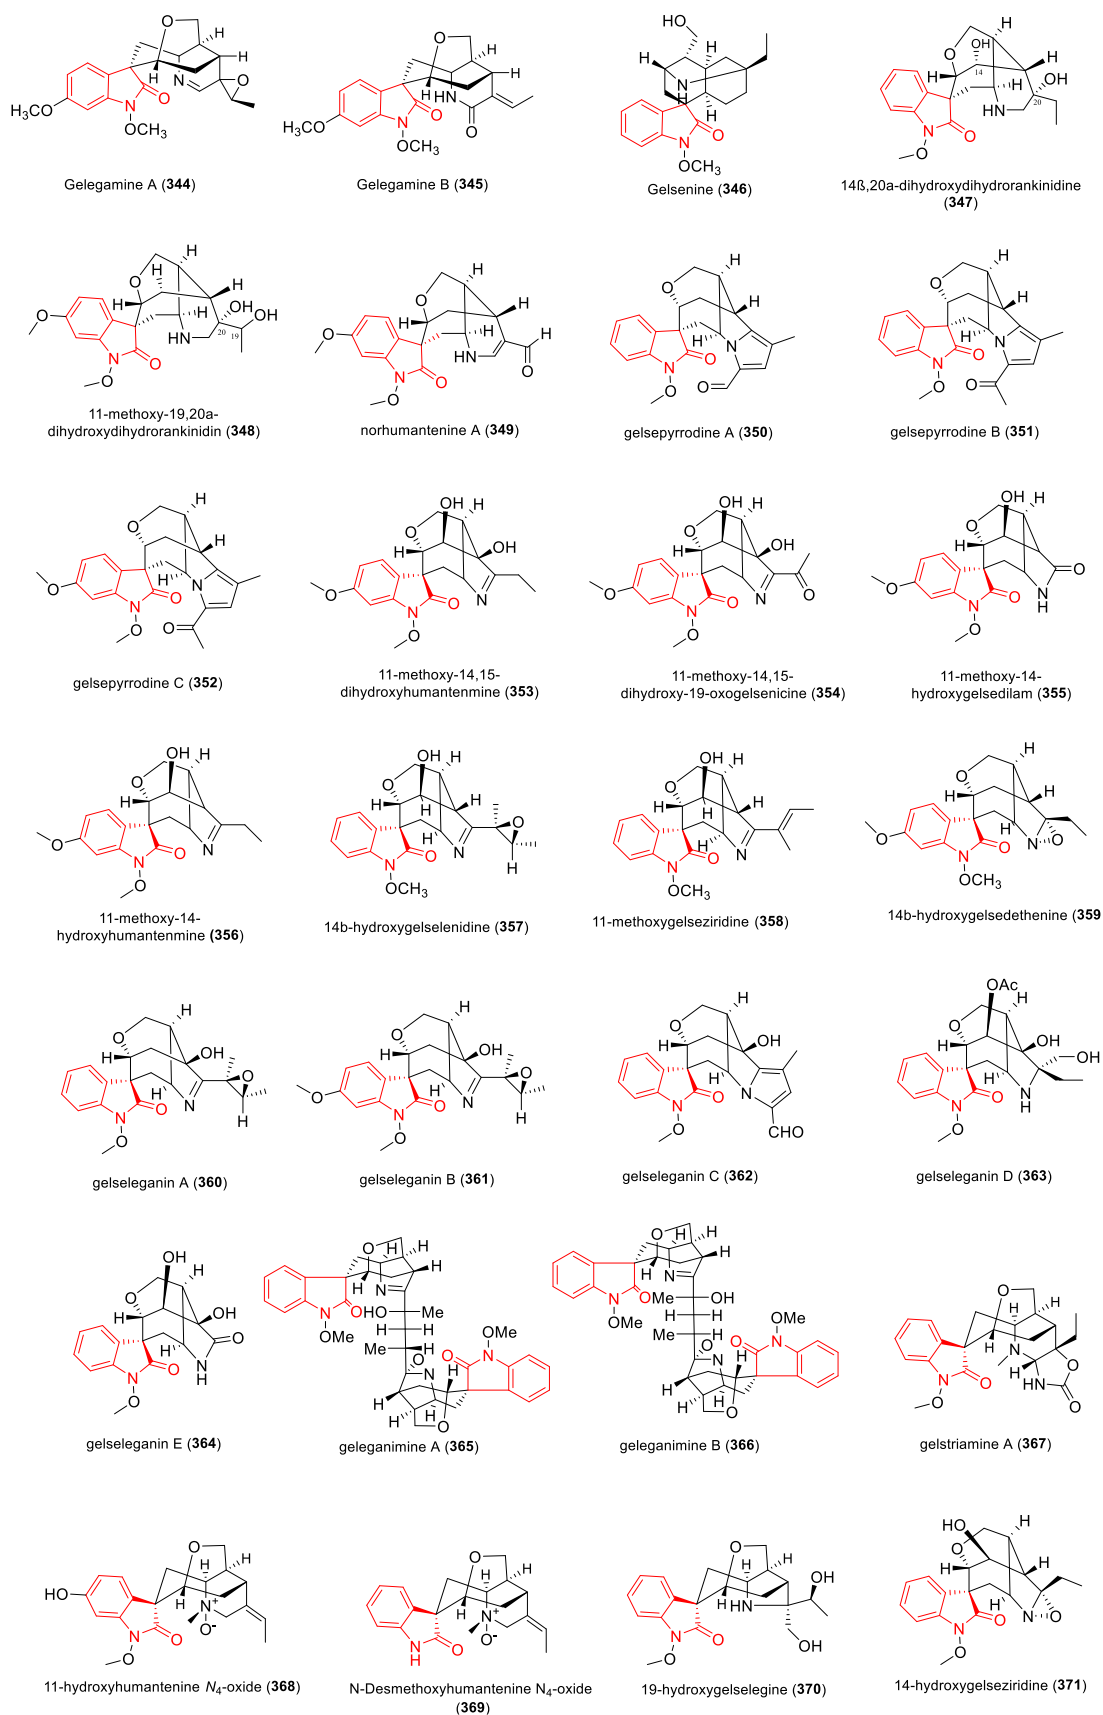



**Figure S2.** SOAs from *Gelsemium* genus (before 2023) (continued)

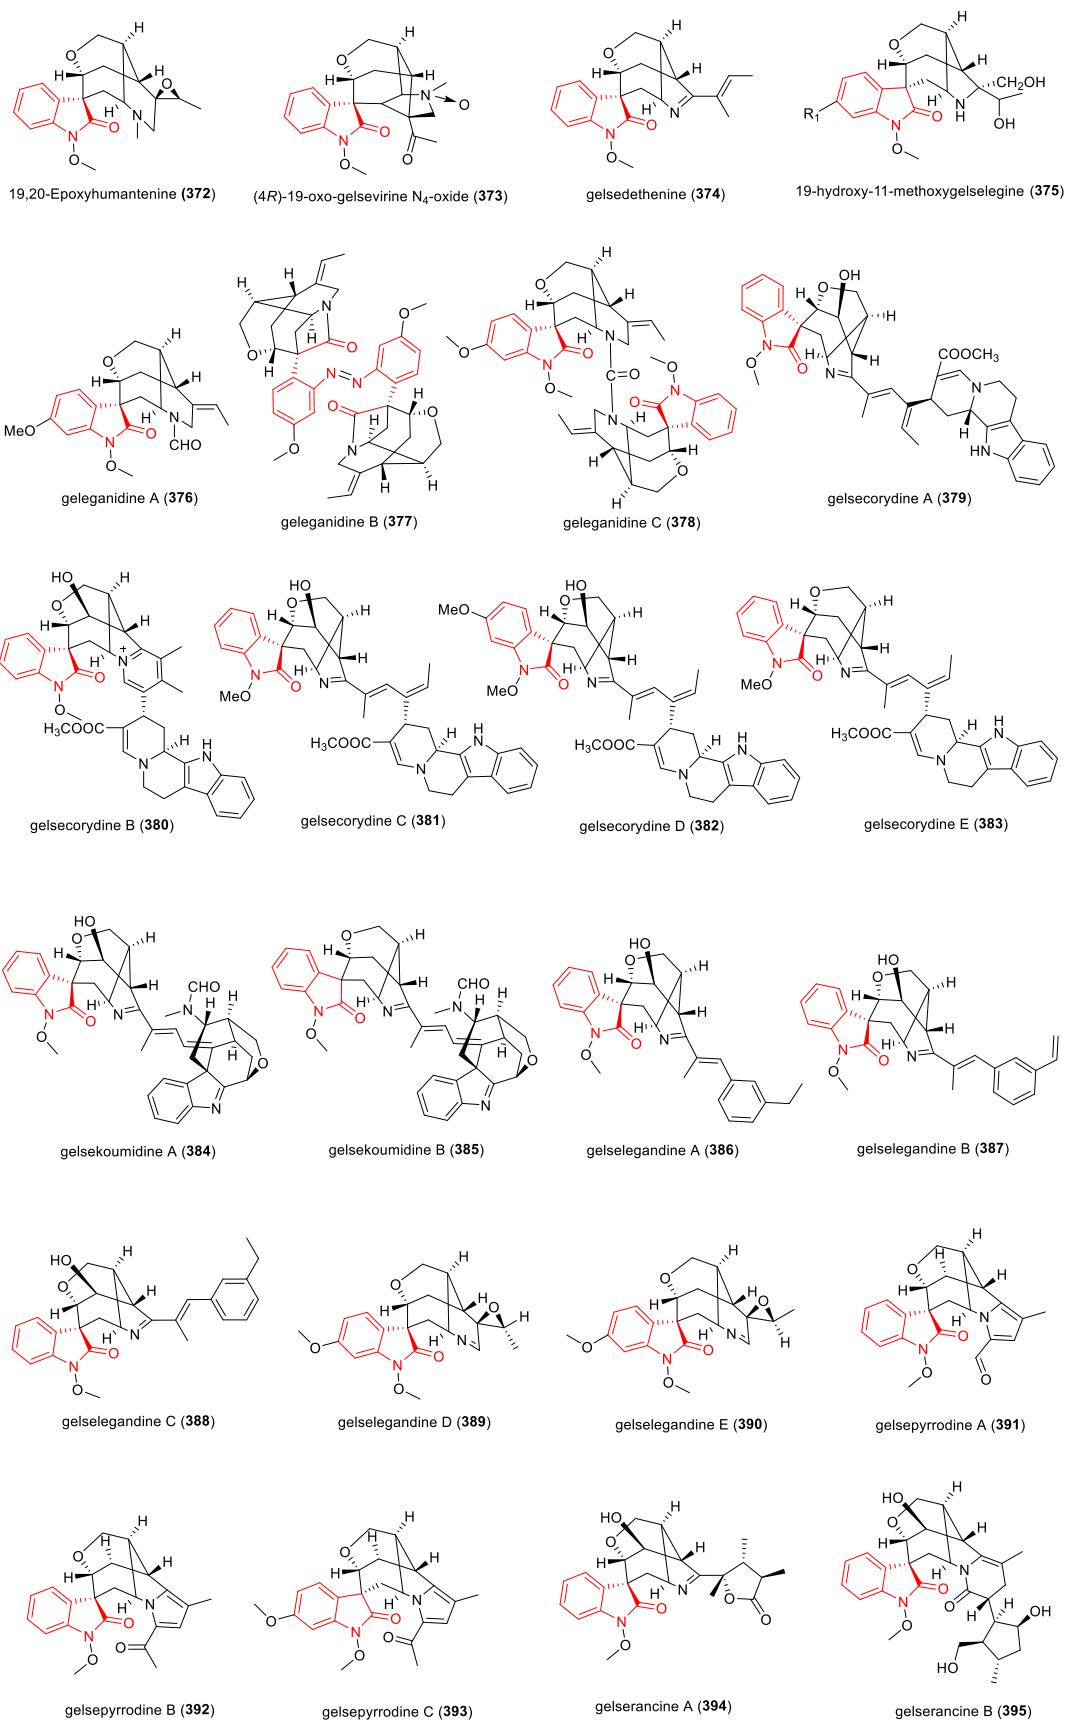

**Figure S2.** SOAs from *Gelsemium* genus (before 2023) (continued)

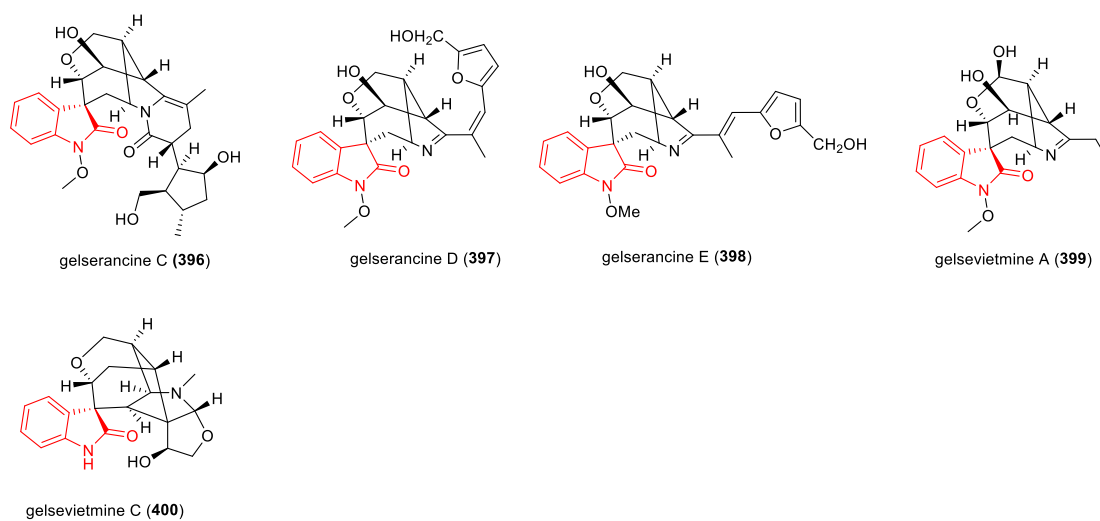

**Figure S3.** SOAs from *Alangium*, *Mappiodoside* and *Nauclea*

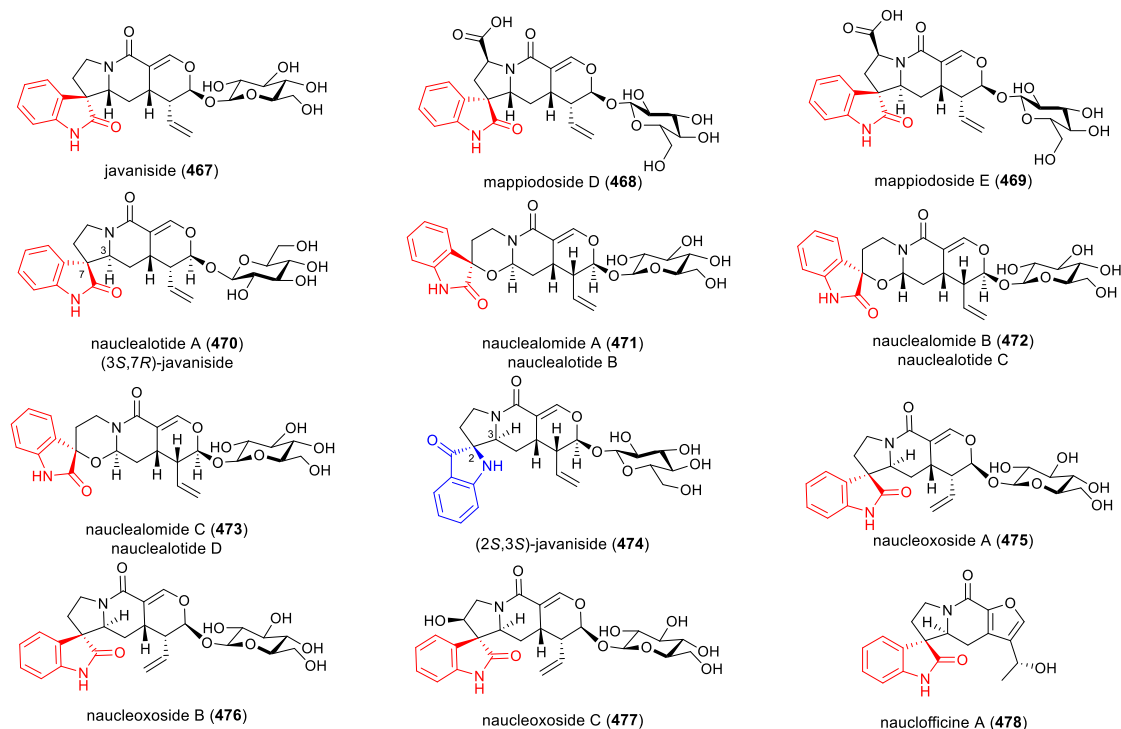

The genus *Alangium*, belonging to the Alangiaceae family, has traditionally been used as folk medicine to treat rheumatism.<sup>1</sup> The genus *Mappianthus* (Icacinaceae family) consists of three species which are distributed in subtropical and tropical regions.<sup>2</sup> The genus *Nauclea* (Rubiaceae) is widely used as the traditional Chinese medicine. Although these genera are distinct, the SOAs they produced exhibit similar skeletal structures. In 2004, Ma and Hecht isolated F 2-oxoindole alkaloid javaniside (**467**) from *A. javanicum*.<sup>3</sup> Mappiodosides D (**468**) and E (**469**) were isolated from the stems of *M. iodoides*, with **468** was closely related to **467** except for the existence of a carboxyl group at C-5.<sup>2</sup> Nauclealotide A (**470**), also named (3*S*,7*R*)-javaniside, was isolated from *N. officinalis*.<sup>5</sup> Nauclealotide A (**471**) was isolated in 2015, possessing a rare tetrahydro-2*H*-1,3-oxazine ring.<sup>5</sup> Nauclealotides B (**472**) and C (**473**) were also isolated from *N. officinalis*, and their planar structures were identical to that of **471**.<sup>7</sup> In 2022, (2*S*,3*S*)-javaniside (**474**) was isolated from the stems of *N. officinalis*,<sup>8</sup> and naucleoxoside A-C (**475**-**477**) were identified in rat plasma after oral administration of total alkaloids extracted from *N. officinalis*.<sup>9</sup> In 2025, naucleofficine A (**478**) possessing a monoterpene 2-oxindole core structure, a spiro B/C moiety, and a furan E ring, was isolated from *N. officinalis*.<sup>10</sup>

**Figure S4.** SOAs from *Tabernaemontana*

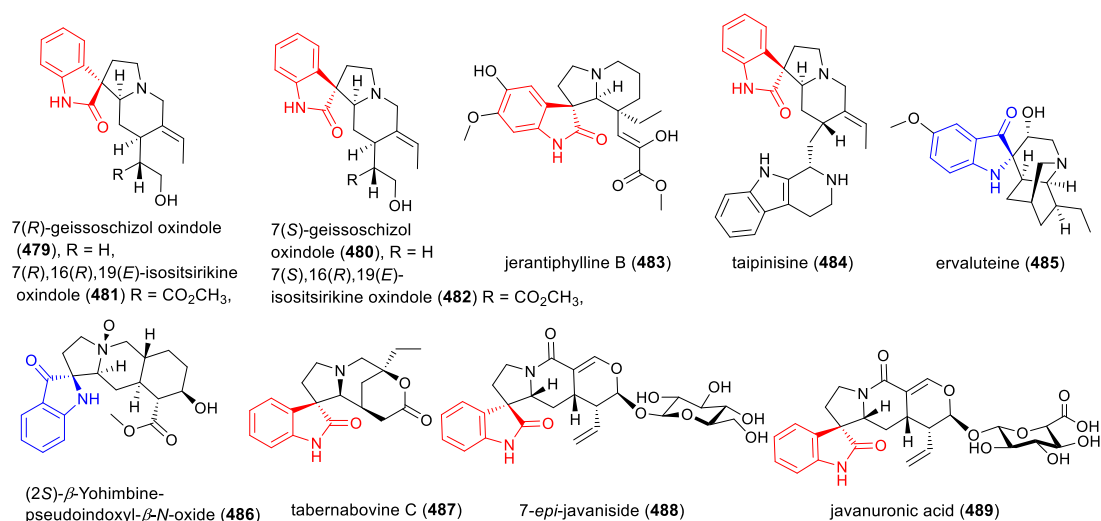

The genus of *Tabernaemontana* (Apocynaceae) is a prolific source of the monoterpene indole alkaloids, known to produce a variety of skeletal types, including secotabersonine alkaloids, bisvobtusine-type alkaloids, and bis-vobasiny-ibogan indole alkaloids.<sup>11</sup> In 2009, Kam's group isolated four tetracyclic oxindole alkaloids from the Malayan *T. corymbosa*, including 7(*R*)- and 7(*S*)-geissoschizol oxindole (**479** and **480**), 7(*R*),16(*R*)- and 7(*S*),16(*R*)-19(*E*)-isositsirikine oxindole (**481** and **482**).<sup>12</sup> In the same year, they also discovered jerantiphylline B (**483**).<sup>13</sup> Later, in 2014, they isolated the bisindole alkaloid taipinsine (**484**) and proposed the oxindole half of this heterodimer was a tetracyclic corynanthean oxindole with an ethylidene side chain, while the other partner, derived from tryptamine, was a tetrahydro-β-carboline.<sup>14</sup> In 2015, Kam and co-workers isolated ervaluteine (**485**), a 6-hydroxy derivative of ibogaine pseudoindoxyl.<sup>15</sup> (2*S*)-β-Yohimbine-pseudoindoxyl-β-*N*-oxide (**486**), an oxidation products of β-yohimbine, was isolated from the leaves of *T. corymbosa*.<sup>16</sup> In 2019, tabernabovine C (**487**) was isolated from the leaves of *T. bovina*, and exhibited a bridged ring.<sup>17</sup> In 2023, avaniside derivatives 7-*epi*-javaniside (**488**) and javanuronic (**489**) were isolated from the methanolic leaf extract of *T. peduncularis*.<sup>18</sup>

**Figure S5.** SOAs from *Ervatamia*

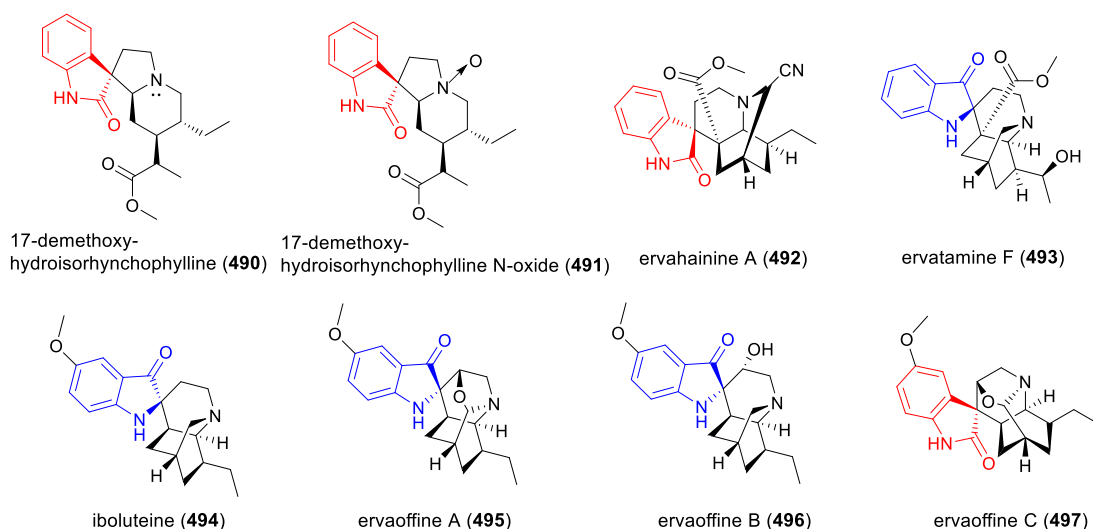

Apart from the genera *Alstonia* and *Tabernaemontana*, the genus *Ervatamia* is also belonging to the Apocynaceae family, and many of which have long been used in Traditional Chinese Medicine.<sup>19</sup> In 1999, 17-demethoxy-hydroisorhynchophylline (**490**) and 17-demethoxy-hydroisorhynchophylline *N*-oxide (**491**) were isolated from *E. yunnanensis* by Liu and co-workers.<sup>19</sup> In 2013, ervahainine A (**492**), a new cyano-substituted oxindole alkaloid, was isolated from *E. hainanensis*. The structure was confirmed by X-ray diffraction analysis.<sup>20</sup> In 2015, ervatamine F (**493**) was isolated from *E. hainanensis* by Gao and co-workers, and was 19-hydroxycoronaridine pseudoindoxy.<sup>21</sup> Additionally, Iboluteine (**494**) and ervaoffines A-C (**495-497**), new iboga-type derivatives, were isolated from the twigs and leaves of *E. officinalis*.<sup>22</sup>

**Figure S6.** SOAs from *Voacanga*

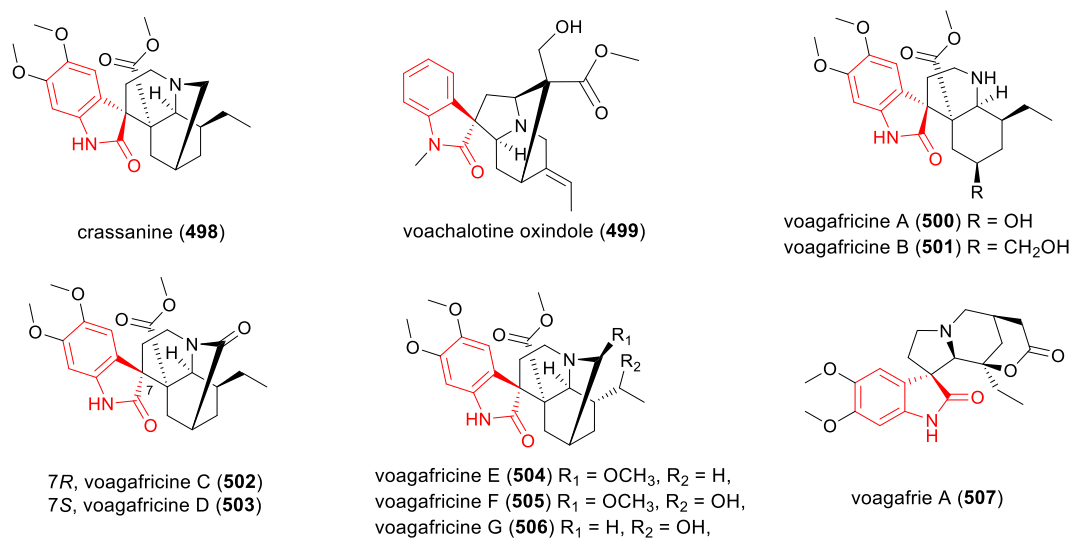

The genus *Voacanga* also belongs to Apocynaceae family. In 1968, crassanine (**498**) was first isolated from *T. crassa*.<sup>23</sup> In 2024, Qin et al isolated **498** from *V. Africana* and suggested that it could serve as a chemotaxonomic markers to distinguish this genus from other plant species in the family.<sup>24</sup> In 1969, voachalotine oxindole (**499**) was isolated from *V. chalotiana* by Braekman and co-workers.<sup>25</sup> In 2023, Qin et al isolated seven rare SOAs, voagafricines A-G (**500–506**), from the stem barks of *V. africana*. These compounds feature a unique 6/5 indoleone ring system conjugated with a 3,4'-decahydroquinoline spiral ring, derived from a secoquinolhiddin core.<sup>26</sup> In 2025, Ding et al. isolated voagafricine A (**507**) from *V. africana*, which possessed a unique 6/5/5/6/6 spiral ring with an indolone-fused 9-oxo-3aza-tricyclo[6,3,1,0<sup>3,7</sup>]-12-alkane-10-carbonyllactone.<sup>27</sup>

**Figure S7.** SOAs from *Catharanthus*

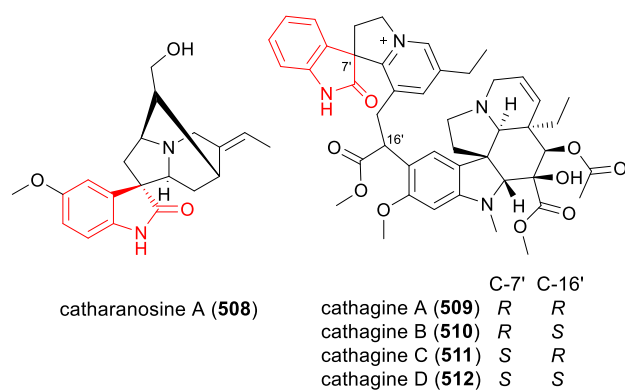

SOAs have been rarely reported in the *Catharanthus* genus until now. In 2021, catharanosine A (**508**) was isolated from the twigs and leaves of *C. roseus*,<sup>28</sup> In 2025, cathagine A-D (**509-512**) consisting of an aspidosperma and the fused tetracyclic 3-spirooxindole derived from an iboga type skeleton were isolated from the whole plant of *C. roseus* by Hirasawa et al<sup>29</sup>

**Figure S8.** SOAs from *Aspidosperma*, *Vinca* and *Rauvolfia*

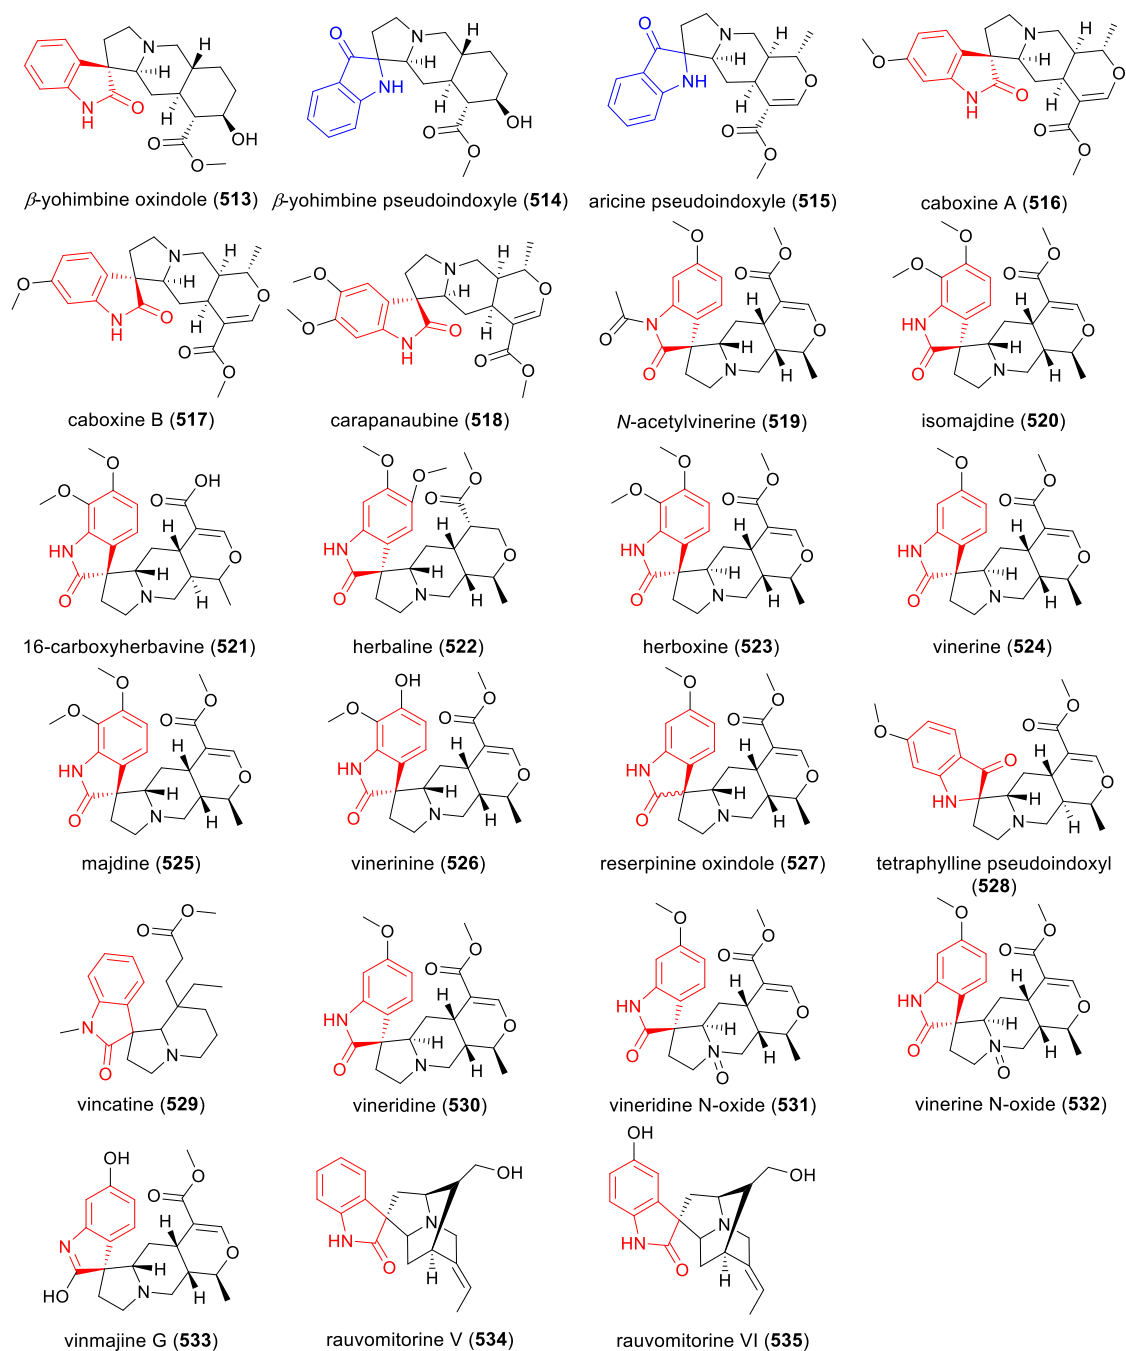

The SOAs from genera *Aspidosperm*, *Vinca*, and *Rauvolfia* share nearly identical core structures. In 1983,  $\beta$ -yohimbine oxindole (**513**),  $\beta$ -yohimbine pseudoindoxyle (**514**), and aricine pseudoindoxyle (**515**) were isolated from the seeds of *A. oblongum*,<sup>30</sup> the absolute configuration of the spiro center in **514** and **515** remain uncertain. In 2011, caboxine A (**516**) and B (**517**), carapanaubine (**518**) were isolated from *A. rigidum* and



*A. schultesii*.<sup>31</sup> SOAs **516-518** were also isolated from *Vinca* and *Rauvolfia* genera.<sup>32,33</sup> Besides, compounds **519-535** (Figure S3) were isolated from these genera as documented in the reviews by Vrabec et al<sup>32</sup> and Sunil et al<sup>33</sup>.

## References

1. X.-Y. Hu, X. Wei, Y.-Q. Zhou, X.-W. Liu, J.-X. Li, W. Zhang, C.-B. Wang, L.-Y. Zhang and Y. Zhou, *Fitoterapia*, 2020, **147**, 104773.
2. H. J. Cong, Q. Zhao, S. W. Zhang, J. J. Wei, W. Q. Wang and L. J. Xuan, *Phytochemistry*, 2014, **100**, 76–85.
3. J. Ma and S. M. Hecht, *Chem. Commun.*, 2004, 1190–1191.
4. V. C. Pham, J. Ma, S. J. Thomas, Z. Xu and S. M. Hecht, *J. Nat. Prod.*, 2005, **68**, 1147–1152.
5. L. Fan, X. J. Huang, C. L. Fan, G. Q. Li, Z. L. Wu, S. G. Li, Z. D. He, Y. Wang and W. C. Ye, *Nat. Prod. Commun.*, 2015, **10**, 2087–2090.
6. X.X. Pi, G.Z. Tu, T.Z. Cai, R. Yang, Q. Wu, H.Z. Fu, *J. Chin. Pharm. Sci.* 2014, **23**, 306–310.
7. L. Fan, C. H. Liao, Q. R. Kang, K. Zheng, Y. C. Jiang and Z. D. He, *Molecules*, 2016, **21**, 968.
8. G. Wang, L. Hou, Y. Wang, H. Liu, J. Yuan, H. Hua and L. Sun, *Fitoterapia*, 2022, **160**, 105228.
9. G. Wang, H. Wang, Z. Lin, L. Hou, J. Y. Wang and L. Sun, *J. Ethnopharmacol.*, 2022, **282**, 114560.
10. Y. L. Li, T. Wang, H. Wang, Q. Wang, C. H. Cai, G. P. Zhu, W. L. Mei, F. Q. Xu, H. F. Dai and S. Z. Huang, *J. Ethnopharmacol.*, 2025, **344**, 119533.
11. A. ATHIPORNCHAI, *Asian J Pharm Clin Res*, 2018, **11**, 45–53.
12. K. H. Lim, K. M. Sim, G. H. Tan and T. S. Kam, *Phytochemistry*, 2009, **70**, 1182–1186.
13. K. H. Lim, N. F. Thomas, Z. Abdullah and T. S. Kam, *Phytochemistry*, 2009, **70**, 424–429.
14. D. S. Sim, K. W. Chong, C. E. Nge, Y. Y. Low, K. S. Sim and T. S. Kam, *J. Nat. Prod.*, 2014, **77**, 2504–2512.
15. K. H. Lim, V. J. Raja, T. D. Bradshaw, S. H. Lim, Y. Y. Low and T. S. Kam, *J. Nat. Prod.*, 2015, **78**, 1129–1138.
16. A. E. Nugroho, M. Moue, T. Sasaki, O. Shiota, A. H. A. Hadi and H. Morita, *Nat. Prod. Commun.*, 2018, **13**, 347–350.
17. Y. Yu, M.-F. Bao, J. Wu, J. Chen, Y.-R. Yang, J. Schinnerl and X.-H. Cai, *Org. Lett.*, 2019, **21**, 5938–5942.
18. F. Traxler, H. Zhang, W. Mahavorasirikul, K. Krivanek, X. H. Cai, W. Aiyakool, M. Pfeiffer, L. Brecker and J. Schinnerl, *Molecules*, 2023, **28**, 6664.
19. Y. Yu, J. M. Gao and J. K. Liu, *Chinese. Chem. Lett.*, 1999, **10**, 575–578.
20. Z. W. Liu, T. T. Yang, W. J. Wang, G. Q. Li, B. Q. Tang, Q. W. Zhang, C. L. Fan, D. M. Zhang, X. Q. Zhang and W. C. Ye, *Tetrahedron. Lett.*, 2013, **54**, 6498–6500.
21. D. B. Zhang, D. G. Yu, M. Sun, X. X. Zhu, X. J. Yao, S. Y. Zhou, J. J. Chen and K. Gao, *J. Nat. Prod.*, 2015, **78**, 1253–1261.
22. P. Clivio, B. Richard, J.-R. Deverre, T. Sevenet, M. Zeches and L. Le Men-Oliver, *Phytochemistry*, 1991, **30**, 3785–3792.
23. M. P. Cava, Y. Watanabe and K. Bessho, *J. Org. Chem.*, 1968, **33**, 3350–3352.
24. M. Qin, W. Gao, H. Wang, S. Yin, J. Hu, W. Gao and C. Ding, *Biochem. Syst. Ecol.*, 2024, **116**, 104863.
25. J.-C. Braekman, M. Tirions-Lampe and J. Pecher, *Bull. SOC. Chim. Belges.*, 1969, **78**, 523–538.
26. M. Qin, Y. Li, W. Xu, W. Gao, S. Yin, X. Hu, R. Zhang and C. Ding, *Bioorg. Chem.*, 2023, **140**, 106780.

27. C.-F. Ding, M.-L. Qin, K.-Y. Zhao, W. Gao, S.-Z. Yin, X.-G. Hu, G.-G. Cheng, R.-P. Zhang and W.-Y. Hu, *Phytochemistry*, 2025, **231**, 114361.
28. Z. T. Deng, W. Y. Li, L. Wang, Z. P. Zhou, X. D. Wu, Z. T. Ding and Q. S. Zhao, *Molecules*, 2021, **26**, 6516.
29. Y. Hirasawa, C. Kasagi, E. Koyama, H. Myojin, T. Tougan, T. Horii, N. Uchiyama, T. Kaneda and H. Morita, *J. Nat. Med.*, 2024, **79**, 134–142.
30. G. M. T. Robert, A. Ahond, C. Poupat, P. Potier, H. Jacquemin and S. K. Kan, *J. Nat. Prod.*, 1983, **46**, 708–722.
31. M. Reina, W. Ruiz-Mesia, L. Ruiz-Mesia, R. Martinez-Diaz and A. Gonzalez-Coloma, *Z. Naturforsch. C. J. Biosci.*, 2011, **66**, 225–234.
32. R. Vrabec, P. Drasar, L. Opletal, S. Kosturko, G. Blunden and L. Cahliková, *Phytochem. Rev.*, 2025, DOI: 10.1007/s11101-025-10102-z.
33. S. Kumar, D. Kumari and B. Singh, *J. Ethnopharmacol.*, 2022, **295**, 115327.
